# Supplementary material for: Theoretical studies on the characterization of classical and non-classical C68 isomers and their newly synthesized derivatives by spectroscopy
Source: Royal Society of Chemistry journal article supplement (doi:10.1039/d4tc00335g), 2024-01-01
Supplement: d4tc00335g1.pdf [file d4tc00335g1.pdf]

## Supplementary Information

### Theoretical Studies on Characterization of Classical and Non-classical C<sub>68</sub> Isomers and Their Newly Synthesized Derivatives by Spectroscopy

Yuling Wang, Tao Gao, Qiuyue Ge, and Jiayuan Qi\*

*College of Chemistry, Fuzhou University, Fuzhou, Fujian, 350116, People's Republic of China*

#### Table of contents

1. The calculated energies and relative energies of Sc<sub>2</sub>C<sub>2</sub>@C<sub>2</sub>-<sup>#6073</sup>C<sub>68</sub> via or without the pseudopotential basis set.....S2
2. The relative energies of singlet and triplet states of C<sub>68</sub> systems..... S2
3. The bond lengths of C<sub>1</sub>-C<sub>68</sub>Cl<sub>28</sub>, C<sub>1</sub>-C<sub>68</sub>Cl<sub>26</sub>(OH)<sub>2</sub>, C<sub>1</sub>-C<sub>68</sub>Cl<sub>25</sub>(OH)<sub>3</sub> and Sc<sub>2</sub>C<sub>2</sub>@C<sub>2</sub>-<sup>#6073</sup>C<sub>68</sub> are compared with previous work.....S3-S4
4. UV-Vis absorption spectra of Sc<sub>2</sub>C<sub>2</sub>@C<sub>2</sub>-<sup>#6073</sup>C<sub>68</sub> simulated by using functionals with different HF%.....S5
5. Kohn–Sham orbitals of two C<sub>68</sub> isomers and their derivatives.....S6
6. The natural charges of the derivatives C<sub>1</sub>-C<sub>68</sub>Cl<sub>28</sub>, C<sub>1</sub>-C<sub>68</sub>Cl<sub>26</sub>(OH)<sub>2</sub>, C<sub>1</sub>-C<sub>68</sub>Cl<sub>25</sub>(OH)<sub>3</sub> as well as Sc<sub>2</sub>C<sub>2</sub>@C<sub>2</sub>-<sup>#6073</sup>C<sub>68</sub>.....S7-S11
7. Binding Energies.....S12
8. Optimized coordinates of C<sub>2v</sub>-<sup>#6073</sup>C<sub>68</sub> in gas phase .....S13-S14
9. Optimized coordinates of C<sub>1</sub>-C<sub>68</sub>(NC3) in gas phase.....S15-S16
10. Optimized coordinates of C<sub>1</sub>-C<sub>68</sub>Cl<sub>28</sub> in gas phase.....S17-S19
11. Optimized coordinates of C<sub>1</sub>-C<sub>68</sub>Cl<sub>26</sub>(OH)<sub>2</sub> in gas phase.....S20-S22
12. Optimized coordinates of C<sub>1</sub>-C<sub>68</sub>Cl<sub>25</sub>(OH)<sub>3</sub> in gas phase.....S23-S25

|                                                                                                                          |                |           |
|--------------------------------------------------------------------------------------------------------------------------|----------------|-----------|
| <b>13. Optimized coordinates of <math>\text{Sc}_2\text{C}_2@C_2\text{-}^{6073}\text{C}_{68}</math> in gas phase.....</b> | <b>S26-S27</b> |           |
| <b>14. The</b>                                                                                                           | <b>details</b> | <b>of</b> |
| <b>calculation.....</b>                                                                                                  | <b>S28</b>     |           |

**1. The calculated energies and relative energies of  $\text{Sc}_2\text{C}_2@C_2\text{-}^{\#6073}\text{C}_{68}$  via or without the pseudopotential basis set:**

Table S1. The energies (kcal/mol) of isomer  $\text{Sc}_2\text{C}_2@C_2\text{-}^{\#6073}\text{C}_{68}$  at the TPSSh-D3BJ/6-311+G(3df, 3pd) or TPSSh-D3BJ/6-311+G(3df, 3pd) ~ Lanl2DZ level.

| Molecule                                                  | Pseudopotential basis set | energy(au) | Relative energy(au) |
|-----------------------------------------------------------|---------------------------|------------|---------------------|
| $\text{Sc}_2\text{C}_2@C_2\text{-}^{\#6073}\text{C}_{68}$ | None                      | -4190.09   | 0                   |
|                                                           | Lanl2DZ                   | -2761.54   | 1428.55             |

**2. The relative energies of singlet and triplet states of  $\text{C}_{68}$  systems :**

Table S2. The relative energies (kcal/mol) of singlet and triplet states of two  $\text{C}_{68}$  isomers. The three external derivatives at the B3LYP-D3BJ/6-311+G(3df, 3pd) level, while the embedded derivative  $\text{Sc}_2\text{C}_2@C_2\text{-}^{\#6073}\text{C}_{68}$  at the TPSSh-D3BJ/6-311+G(3df, 3pd) level.

| Molecule                                                            | Relative energies |
|---------------------------------------------------------------------|-------------------|
| $C_{2v}\text{-}^{\#6073}\text{C}_{68}$ (singlet)                    | 0.00              |
| $C_{2v}\text{-}^{\#6073}\text{C}_{68}$ (triplet)                    | 3.15              |
| -----                                                               |                   |
| $C_1\text{-C}_{68}(\text{NC}3)$ (singlet)                           | 0.00              |
| $C_1\text{-C}_{68}(\text{NC}3)$ (triplet)                           | 0.72              |
| -----                                                               |                   |
| $C_1\text{-C}_{68}\text{Cl}_{28}$ (singlet)                         | 0.00              |
| $C_1\text{-C}_{68}\text{Cl}_{28}$ (triplet)                         | 54.18             |
| -----                                                               |                   |
| $C_1\text{-C}_{68}\text{Cl}_{26}(\text{OH})_2$ (singlet)            | 0.00              |
| $C_1\text{-C}_{68}\text{Cl}_{26}(\text{OH})_2$ (triplet)            | 49.66             |
| -----                                                               |                   |
| $C_1\text{-C}_{68}\text{Cl}_{25}(\text{OH})_3$ (singlet)            | 0.00              |
| $C_1\text{-C}_{68}\text{Cl}_{25}(\text{OH})_3$ (triplet)            | 49.61             |
| -----                                                               |                   |
| $\text{Sc}_2\text{C}_2@C_2\text{-}^{\#6073}\text{C}_{68}$ (singlet) | 0.00              |
| $\text{Sc}_2\text{C}_2@C_2\text{-}^{\#6073}\text{C}_{68}$ (triplet) | 13.39             |

### 3. The bond lengths of $C_1-C_{68}Cl_{28}$ , $C_1-C_{68}Cl_{26}(OH)_2$ , $C_1-C_{68}Cl_{25}(OH)_3$ and $Sc_2C_2@C_2-^{#6073}C_{68}$ are compared with previous work:

The partial bond length information of chlorinated derivative  $C_1-C_{68}Cl_{28}$  with its partially hydrolyzed derivatives  $C_1-C_{68}Cl_{26}(OH)_2$  and  $C_1-C_{68}Cl_{25}(OH)_3$  can be seen in Table S3. The table makes it apparent that our computed bond length data are almost consistent with previous findings even if they exist a little bit high. This is mainly because different computation techniques were used. The predecessors used GAMESS (US) software to optimize derivatives  $C_1-C_{68}Cl_{28}$ ,  $C_1-C_{68}Cl_{26}(OH)_2$ , and  $C_1-C_{68}Cl_{25}(OH)_3$  at mPW3PBE/Def2-TZVP functional level,<sup>1</sup> while we optimized the three derivatives at the B3LYP/6-31G(d) level and taking into account dispersion interactions (D3BJ) using the Gaussian 16 quantum chemical package. For instance, our computed findings for the  $R_{C-Cl}$  and average  $R_{C-Cl}$  in the table are only 0.02-0.03 Å longer than the prior. Similarly, for the bond lengths of O-H... Cl as well as O-H ...Cl, our results are merely 0.06 Å and 0.08 Å longer than the earlier findings. As a consequence, our computation technique is trustworthy and logical, and it is meaningful to calculate and evaluate the geometric structures of non-classical fullerenes and their derivatives at the same theoretical level. The partial bond length statistics of  $Sc_2C_2@C_2-^{#6073}C_{68}$  are presented in Figure S1 (b), and the conclusions are nearly entirely in line with prior investigations. In order to acquire the bond length data for  $Sc_2C_2@C_2-^{#6073}C_{68}$ , predecessors employed Material Studio software to do geometric optimization at the GGA-PBE/DNP level,<sup>2</sup> and we optimized the derivative  $Sc_2C_2@C_2-^{#6073}C_{68}$  at the TPSSh-D3BJ/6-31G(d) level using the Gaussian 16 quantum chemical package. The bond length data agreed well despite the different calculation techniques we utilized. This also demonstrates why it is reasonable to compute metallic carbide clusterfullerene  $Sc_2C_2@C_2-^{#6073}C_{68}$  using the TPSSh functional.

Table S3. Statistics of Bond Lengths (Å) that compared to earlier research of the derivatives  $C_1-C_{68}Cl_{28}$ ,  $C_1-C_{68}Cl_{26}(OH)_2$ , and  $C_1-C_{68}Cl_{25}(OH)_3$ .

|                     | <sup>a</sup> Average $R_{C-Cl}$ | <sup>b</sup> $R_{C-Cl}$ | <sup>c</sup> $R_{O-H \dots Cl}$ | <sup>c</sup> $R_{O-H \dots O}$ |
|---------------------|---------------------------------|-------------------------|---------------------------------|--------------------------------|
| Theory <sup>1</sup> | 1.77                            | 1.80–1.82               | 3.19–3.24                       | 2.94                           |
| This Study          | 1.79                            | 1.83–1.85               | 3.26–3.32                       | 3.00                           |

<sup>a</sup>the average bond length over the sites of pentagon–pentagon fusion in  $C_1-C_{68}Cl_{28}$ . <sup>b</sup>the four C–Cl bonds indicated in Figure S1.(a). <sup>c</sup>  $C_1-C_{68}Cl_{26}(OH)_2$  and  $C_1-C_{68}Cl_{25}(OH)_3$  weak intramolecular hydrogen bonds

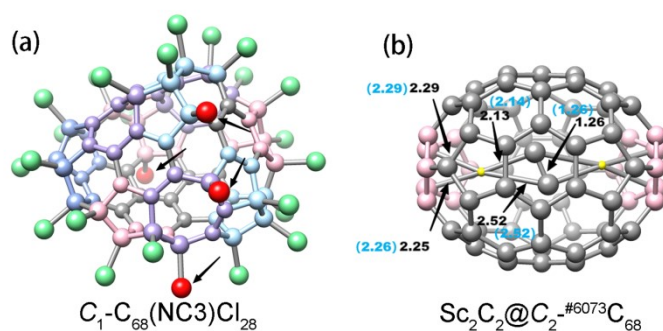

Figure S1. (a) The four chlorine atoms that C-Cl bond lengths longer than 1.8 Å in derivative  $C_1-C_{68}Cl_{28}$  are indicated in red. (b) Partial bond lengths of embedded derivative  $Sc_2C_2@C_2-^{#6073}C_{68}$  and the length data from earlier investigation<sup>2</sup> are displayed in blue.

#### 4. Kohn–Sham orbitals of two $C_{68}$ isomers and their derivatives:

Figure S2 presents the localized HOMO and LUMO of the six molecules analyzed in paper. This can be observed that the orbitals have a significant difference between the pure cages and their derivatives. This suggests that either by inserting the metal carbide or by chlorinating the pure cage, the truth is feasible to effectively modify the geometry and electrical structure of the fullerene  $C_{68}$ . It originates from electrons moving between the embedded metal carbide or chlorine atoms with the pure cage. The positive and negative aspects of the orbitals are represented in the illustration by the colors red and blue, respectively. Figure S2 shows that the hydroxyl groups or the chlorine atoms have important interactions with the pure cage in the derivatives of  $C_1-C_{68}(NC3)$ . The embedded derivative  $Sc_2C_2@C_{2v}^{-\#6073}C_{68}$  shows a strong interaction between the metal Sc and the carbon cage and exhibits blue electron clouds dominating the carbon cage skeleton and red electron clouds centered mostly on the embedded metal carbide  $Sc_2C_2$  cluster. In other words, the metal carbide  $Sc_2C_2$  contains the majority of the positive charges. This agrees with the calculation result of the NBO.

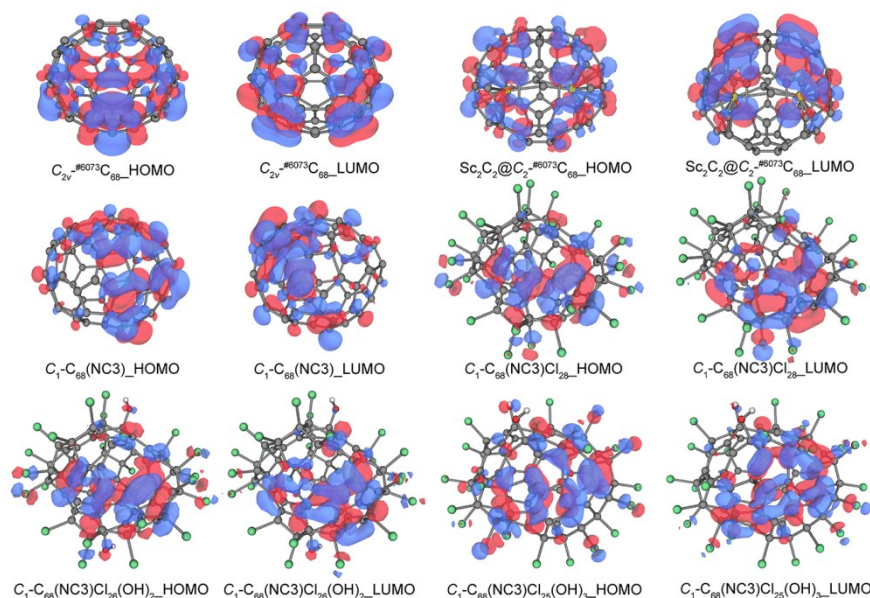

Figure S2. Isosurfaces of the HOMO and LUMO for the  $C_1-C_{68}(NC3)$  and the corresponding three derivatives  $C_1-C_{68}Cl_{28}$ ,  $C_1-C_{68}Cl_{26}(OH)_2$ , and  $C_1-C_{68}Cl_{25}(OH)_3$ , along with  $C_{2v}^{-\#6073}C_{68}$  and its derivative  $Sc_2C_2@C_{2v}^{-\#6073}C_{68}$  by using Multiwfn software<sup>3</sup>.

#### 5. UV-vis absorption spectra of $Sc_2C_2@C_{2v}^{-\#6073}C_{68}$ simulated by using functionals

with different HF%

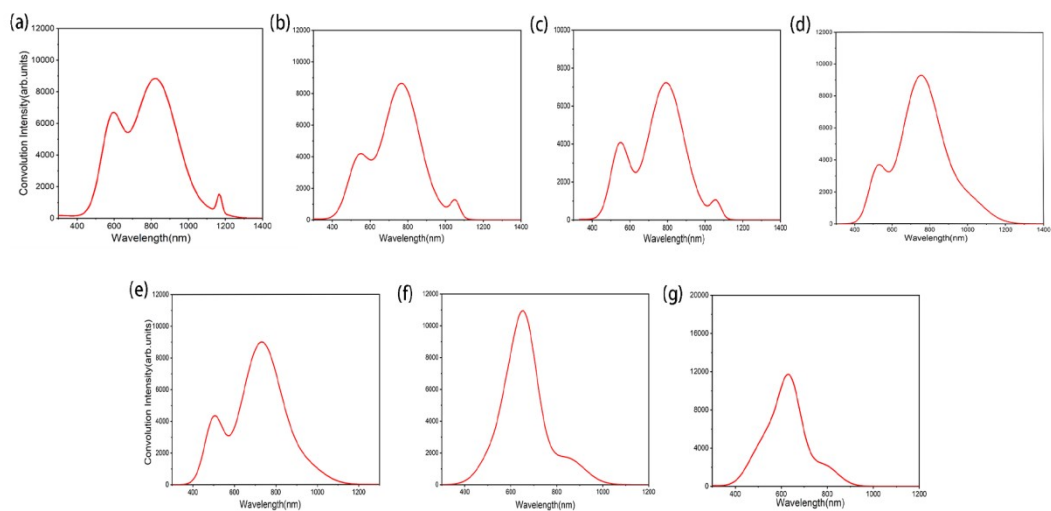

Figure S3. The calculated UV-vis absorption spectra of Sc<sub>2</sub>C<sub>2</sub>@C<sub>2</sub>-#6073C<sub>68</sub> with (a) TPSS(0% HF), (b) TPSSh (10% HF), (c) O3LYP (11.61% HF), (d) B3LYP (20% HF), (e) PBE0 (25% HF), (f) PBE38 (37.5%HF) and (g) M06-2X (54%HF) functionals.

**6. The natural charges of the derivatives  $C_1-C_{68}Cl_{28}$ ,  $C_1-C_{68}Cl_{26}(OH)_2$ ,  $C_1-C_{68}Cl_{25}(OH)_3$  as well as  $Sc_2C_2@C_2-^{#6073}C_{68}$ .**

Table S4. The natural charges of carbon atoms, hydroxyl groups, and the chlorine atoms of the derivatives  $C_1-C_{68}Cl_{28}$ ,  $C_1-C_{68}Cl_{26}(OH)_2$ ,  $C_1-C_{68}Cl_{25}(OH)_3$  at the B3LYP-D3BJ/6-31G level, along with  $Sc_2C_2@C_2-^{#6073}C_{68}$  at the TPSSh-D3BJ/6-31G level. (The carbon atoms attached to the chlorine atom are shown in blue)

| $Sc_2C_2@C_2-^{#6073}C_{68}$ |                | $C_1-C_{68}Cl_{28}$ |                | $C_1-C_{68}Cl_{26}(OH)_2$ |                | $C_1-C_{68}Cl_{25}(OH)_3$ |                |
|------------------------------|----------------|---------------------|----------------|---------------------------|----------------|---------------------------|----------------|
| Atom                         | Natural Charge | Atom                | Natural Charge | Atom                      | Natural Charge | Atom                      | Natural Charge |
| C(1)                         | -0.02431       | C(1)                | 0.01004        | Cl(1)                     | 0.05864        | Cl(1)                     | 0.05696        |
| C(2)                         | -0.02509       | C(2)                | -0.0484        | Cl(2)                     | 0.05305        | Cl(2)                     | 0.05254        |
| C(3)                         | -0.02086       | C(3)                | -0.00266       | Cl(3)                     | 0.04308        | Cl(3)                     | 0.04276        |
| C(4)                         | -0.03307       | C(4)                | 0.01581        | Cl(4)                     | 0.04413        | Cl(4)                     | 0.04028        |
| C(5)                         | -0.04609       | C(5)                | 0.01767        | Cl(5)                     | 0.05544        | Cl(5)                     | 0.05428        |
| C(6)                         | -0.03097       | C(6)                | 0.01195        | Cl(6)                     | 0.05931        | Cl(6)                     | 0.05798        |
| C(7)                         | -0.03776       | C(7)                | 0.01928        | Cl(7)                     | 0.06001        | Cl(7)                     | 0.05899        |
| C(8)                         | -0.04846       | C(8)                | -0.07076       | Cl(8)                     | 0.08589        | Cl(8)                     | 0.08559        |
| C(9)                         | -0.04056       | C(9)                | -0.05724       | Cl(9)                     | 0.0361         | Cl(9)                     | 0.0357         |
| C(10)                        | -0.02472       | C(10)               | -0.06373       | Cl(10)                    | 0.02903        | Cl(10)                    | 0.02161        |
| C(11)                        | -0.05768       | C(11)               | -0.06371       | Cl(11)                    | 0.08305        | Cl(11)                    | 0.05516        |
| C(12)                        | 0.0094         | C(12)               | 0.00956        | Cl(12)                    | -0.00847       | Cl(12)                    | 0.0427         |
| C(13)                        | 0.00885        | C(13)               | 0.02983        | Cl(13)                    | 0.04371        | Cl(13)                    | 0.03704        |
| C(14)                        | -0.00856       | C(14)               | 0.02504        | Cl(14)                    | 0.03763        | Cl(14)                    | 0.04585        |
| C(15)                        | 0.00884        | C(15)               | -0.00939       | Cl(15)                    | 0.04629        | Cl(15)                    | 0.05679        |
| C(16)                        | -0.05267       | C(16)               | 0.01766        | Cl(16)                    | 0.05803        | Cl(16)                    | 0.03266        |
| C(17)                        | -0.02805       | C(17)               | 0.02445        | Cl(17)                    | 0.03348        | Cl(17)                    | 0.08023        |
| C(18)                        | -0.02926       | C(18)               | -0.00315       | Cl(18)                    | 0.08106        | Cl(18)                    | 0.03261        |



---

|       |          |       |          |        |          |        |          |
|-------|----------|-------|----------|--------|----------|--------|----------|
| C(19) | -0.01157 | C(19) | 0.01377  | Cl(19) | 0.03393  | Cl(19) | 0.01895  |
| C(20) | -0.00728 | C(20) | -0.00099 | Cl(20) | 0.01996  | Cl(20) | 0.06435  |
| C(21) | -0.00119 | C(21) | -0.00175 | Cl(21) | 0.06497  | Cl(21) | 0.05623  |
| C(22) | 0.00453  | C(22) | 0.01715  | Cl(22) | 0.05762  | Cl(22) | 0.04245  |
| C(23) | -0.0315  | C(23) | 0.00247  | Cl(23) | 0.0432   | Cl(23) | 0.03918  |
| C(24) | -0.02012 | C(24) | -0.06218 | Cl(24) | 0.04211  | Cl(24) | 0.05751  |
| C(25) | 0.00385  | C(25) | -0.05057 | Cl(25) | 0.05995  | Cl(25) | 0.05998  |
| C(26) | 0.01951  | C(26) | -0.00447 | Cl(26) | 0.06078  | O(26)  | -0.70166 |
| C(27) | -0.03766 | C(27) | 0.01809  | O(27)  | -0.70153 | H(27)  | 0.48752  |
| C(28) | -0.02324 | C(28) | 0.00423  | H(28)  | 0.48757  | O(28)  | -0.71332 |
| C(29) | -0.01721 | C(29) | -0.0059  | O(29)  | -0.70892 | H(29)  | 0.50221  |
| C(30) | -0.01837 | C(30) | 0.01017  | H(30)  | 0.48844  | O(30)  | -0.74097 |
| C(31) | 0.01237  | C(31) | -0.06511 | C(31)  | -0.0498  | H(31)  | 0.50221  |
| C(32) | 0.03011  | C(32) | -0.08236 | C(32)  | -0.06202 | C(32)  | -0.04945 |
| C(33) | 0.01237  | C(33) | -0.06435 | C(33)  | 0.00441  | C(33)  | -0.06144 |
| C(34) | 0.01767  | C(34) | -0.06761 | C(34)  | 0.01764  | C(34)  | 0.00393  |
| C(35) | 0.03011  | C(35) | -0.06775 | C(35)  | -0.07158 | C(35)  | 0.01731  |
| C(36) | 0.00503  | C(36) | -0.07294 | C(36)  | 0.01935  | C(36)  | -0.0715  |
| C(37) | 0.01767  | C(37) | -0.05914 | C(37)  | -0.0042  | C(37)  | 0.01908  |
| C(38) | 0.00503  | C(38) | -0.06625 | C(38)  | -0.00977 | C(38)  | -0.00356 |
| C(39) | -0.01837 | C(39) | 0.01922  | C(39)  | -0.05922 | C(39)  | -0.00855 |
| C(40) | -0.01721 | C(40) | -0.07011 | C(40)  | -0.05647 | C(40)  | -0.05947 |
| C(41) | -0.02324 | C(41) | -0.06149 | C(41)  | -0.02091 | C(41)  | -0.05499 |
| C(42) | -0.03766 | C(42) | -0.05346 | C(42)  | 0.01114  | C(42)  | -0.02467 |
| C(43) | 0.01951  | C(43) | -0.06213 | C(43)  | -0.07085 | C(43)  | 0.00941  |

---

---

|       |          |       |          |       |          |       |          |
|-------|----------|-------|----------|-------|----------|-------|----------|
| C(44) | 0.00385  | C(44) | -0.06374 | C(44) | -0.06302 | C(44) | -0.07059 |
| C(45) | -0.02012 | C(45) | -0.07131 | C(45) | 0.01382  | C(45) | -0.06252 |
| C(46) | -0.0315  | C(46) | 0.01489  | C(46) | -0.00137 | C(46) | 0.01437  |
| C(47) | 0.00453  | C(47) | -0.02328 | C(47) | -0.00689 | C(47) | -0.00123 |
| C(48) | -0.00119 | C(48) | -0.0564  | C(48) | 0.00262  | C(48) | -0.00705 |
| C(49) | -0.00728 | C(49) | -0.05978 | C(49) | 0.25279  | C(49) | 0.0023   |
| C(50) | -0.01157 | C(50) | -0.00778 | C(50) | -0.05557 | C(50) | 0.25274  |
| C(51) | -0.02926 | C(51) | 0.01793  | C(51) | -0.06471 | C(51) | -0.0555  |
| C(52) | -0.02805 | C(52) | -0.06082 | C(52) | 0.00706  | C(52) | -0.06457 |
| C(53) | -0.05267 | C(53) | 0.01651  | C(53) | -0.00624 | C(53) | 0.00755  |
| C(54) | 0.00884  | C(54) | -0.00356 | C(54) | 0.0167   | C(54) | -0.00619 |
| C(55) | -0.00856 | C(55) | 0.01842  | C(55) | -0.06005 | C(55) | 0.01746  |
| C(56) | 0.00885  | C(56) | 0.01511  | C(56) | -0.05675 | C(56) | -0.06163 |
| C(57) | 0.0094   | C(57) | -0.00338 | C(57) | -0.04061 | C(57) | -0.05534 |
| C(58) | -0.05768 | C(58) | 0.01756  | C(58) | -0.0054  | C(58) | 0.25237  |
| C(59) | -0.02472 | C(59) | -0.07621 | C(59) | 0.02479  | C(59) | 0.0061   |
| C(60) | -0.04056 | C(60) | 0.04628  | C(60) | 0.00655  | C(60) | 0.02831  |
| C(61) | -0.04846 | C(61) | -0.06813 | C(61) | 0.00058  | C(61) | 0.00441  |
| C(62) | -0.03776 | C(62) | 0.01059  | C(62) | -0.06198 | C(62) | 0.00025  |
| C(63) | -0.03097 | C(63) | -0.00229 | C(63) | -0.05253 | C(63) | -0.06183 |
| C(64) | -0.04609 | C(64) | 0.04182  | C(64) | -0.00188 | C(64) | -0.05182 |
| C(65) | -0.03307 | C(65) | 0.00932  | C(65) | 0.01372  | C(65) | -0.0017  |
| C(66) | -0.02086 | C(66) | -0.06512 | C(66) | -0.00491 | C(66) | 0.01321  |
| C(67) | -0.02509 | C(67) | -0.05586 | C(67) | 0.00438  | C(67) | -0.00487 |
| C(68) | -0.02431 | C(68) | 0.01532  | C(68) | -0.00427 | C(68) | 0.00435  |

---

---

|        |          |        |          |       |          |       |          |
|--------|----------|--------|----------|-------|----------|-------|----------|
| C(69)  | -0.46659 | CI(69) | -0.00083 | C(69) | -0.01666 | C(69) | -0.00418 |
| C(70)  | -0.46659 | CI(70) | 0.04611  | C(70) | 0.01022  | C(70) | -0.01649 |
| Sc(71) | 1.02267  | CI(71) | 0.08146  | C(71) | -0.06231 | C(71) | 0.01003  |
| Sc(72) | 1.02267  | CI(72) | 0.03899  | C(72) | -0.06515 | C(72) | -0.06238 |
| Total  | 0.00000  | CI(73) | 0.04618  | C(73) | 0.01083  | C(73) | -0.06496 |
|        |          | CI(74) | 0.05291  | C(74) | 0.01703  | C(74) | 0.00964  |
|        |          | CI(75) | 0.05939  | C(75) | -0.00526 | C(75) | 0.01736  |
|        |          | CI(76) | 0.05918  | C(76) | 0.01776  | C(76) | -0.00705 |
|        |          | CI(77) | 0.06592  | C(77) | -0.00345 | C(77) | 0.00872  |
|        |          | CI(78) | 0.05904  | C(78) | 0.01051  | C(78) | -0.01799 |
|        |          | CI(79) | 0.04472  | C(79) | 0.24215  | C(79) | 0.01505  |
|        |          | CI(80) | 0.0433   | C(80) | 0.06308  | C(80) | 0.24364  |
|        |          | CI(81) | 0.06231  | C(81) | -0.06949 | C(81) | 0.06342  |
|        |          | CI(82) | 0.05939  | C(82) | -0.06103 | C(82) | -0.06976 |
|        |          | CI(83) | 0.02287  | C(83) | -0.0693  | C(83) | -0.0609  |
|        |          | CI(84) | 0.03799  | C(84) | 0.00894  | C(84) | -0.06983 |
|        |          | CI(85) | 0.08282  | C(85) | -0.06402 | C(85) | 0.00912  |
|        |          | CI(86) | 0.04028  | C(86) | 0.02547  | C(86) | -0.06414 |
|        |          | CI(87) | 0.04441  | C(87) | 0.01626  | C(87) | 0.02587  |
|        |          | CI(88) | 0.06214  | C(88) | -0.00927 | C(88) | 0.01638  |
|        |          | CI(89) | 0.0613   | C(89) | 0.02249  | C(89) | -0.00913 |
|        |          | CI(90) | 0.0572   | C(90) | 0.02968  | C(90) | 0.02241  |
|        |          | CI(91) | 0.04423  | C(91) | -0.08214 | C(91) | 0.02933  |
|        |          | CI(92) | 0.02905  | C(92) | -0.06405 | C(92) | -0.08207 |
|        |          | CI(93) | 0.02016  | C(93) | -0.06703 | C(93) | -0.06363 |

---

---

|        |         |       |          |       |          |
|--------|---------|-------|----------|-------|----------|
| Cl(94) | 0.03175 | C(94) | -0.06735 | C(94) | -0.06657 |
| Cl(95) | 0.02895 | C(95) | 0.01614  | C(95) | -0.06663 |
| Cl(96) | 0.08393 | C(96) | -0.00584 | C(96) | 0.01364  |
| Total  | 0.00000 | C(97) | -0.05748 | C(97) | -0.00898 |
|        |         | C(98) | -0.07281 | C(98) | -0.0566  |
|        |         | Total | 0.00000  | C(99) | -0.07237 |
|        |         |       |          | Total | 0.00000  |

---

## 7. Binding Energies:

Table S5. The bond C-Cl or C-OH energies of three derivatives  $C_1-C_{68}Cl_{28}$ ,  $C_1-C_{68}Cl_{26}(OH)_2$ , and  $C_1-C_{68}Cl_{25}(OH)_3$  at different stages in the chlorination process.

| $C_1-C_{68}Cl_{28}$ | B3LYP-D3BJ/6-<br>311G* | $C_1-$<br>$C_{68}Cl_{26}(OH)_2$ | B3LYP-D3BJ/6-<br>311G* | $C_1-$<br>$C_{68}Cl_{25}(OH)_3$ | B3LYP-D3BJ/6-<br>311G* |
|---------------------|------------------------|---------------------------------|------------------------|---------------------------------|------------------------|
| $C_{68}$            | -                      | $C_{68}$                        | -                      | $C_{68}$                        | -                      |
| $C_{68}Cl_1$        | -60.2462               | $C_{68}Cl_1$                    | -60.2462               | $C_{68}Cl_1$                    | -60.2462               |
| $C_{68}Cl_2$        | -58.4299               | $C_{68}Cl_2$                    | -58.4299               | $C_{68}Cl_2$                    | -58.4299               |
| $C_{68}Cl_3$        | -33.2734               | $C_{68}Cl_3$                    | -33.2734               | $C_{68}Cl_3$                    | -33.2734               |
| $C_{68}Cl_4$        | -46.9754               | $C_{68}Cl_4$                    | -46.9754               | $C_{68}Cl_4$                    | -46.9754               |
| $C_{68}Cl_5$        | -31.446                | $C_{68}Cl_5$                    | -31.446                | $C_{68}Cl_5$                    | -31.446                |
| $C_{68}Cl_6$        | -40.6254               | $C_{68}Cl_6$                    | -40.6254               | $C_{68}Cl_6$                    | -40.6254               |
| $C_{68}Cl_7$        | -58.0864               | $C_{68}Cl_7$                    | -58.0864               | $C_{68}Cl_7$                    | -58.0864               |
| $C_{68}Cl_8$        | -65.2498               | $C_{68}Cl_8$                    | -65.2498               | $C_{68}Cl_8$                    | -65.2498               |
| $C_{68}Cl_9$        | -64.9965               | $C_{68}Cl_9$                    | -64.9965               | $C_{68}Cl_9$                    | -64.9965               |
| $C_{68}Cl_{10}$     | -40.0167               | $C_{68}Cl_{10}$                 | -40.0167               | $C_{68}Cl_{10}$                 | -40.0167               |
| $C_{68}Cl_{11}$     | -49.2163               | $C_{68}Cl_{11}$                 | -49.2163               | $C_{68}Cl_{11}$                 | -49.2163               |
| $C_{68}Cl_{12}$     | -46.1849               | $C_{68}Cl_{12}$                 | -46.1849               | $C_{68}Cl_{12}$                 | -46.1849               |
| $C_{68}Cl_{13}$     | -69.5757               | $C_{68}Cl_{13}$                 | -69.5757               | $C_{68}Cl_{13}$                 | -69.5757               |
| $C_{68}Cl_{14}$     | -40.8461               | $C_{68}Cl_{14}$                 | -40.8461               | $C_{68}Cl_{14}$                 | -40.8461               |
| $C_{68}Cl_{15}$     | -64.9033               | $C_{68}Cl_{15}$                 | -64.9033               | $C_{68}Cl_{15}$                 | -64.9033               |
| $C_{68}Cl_{16}$     | -39.216                | $C_{68}Cl_{16}$                 | -39.216                | $C_{68}Cl_{16}$                 | -39.216                |
| $C_{68}Cl_{17}$     | -47.4303               | $C_{68}Cl_{17}$                 | -47.4303               | $C_{68}Cl_{17}$                 | -47.4303               |
| $C_{68}Cl_{18}$     | -33.8997               | $C_{68}Cl_{18}$                 | -33.8997               | $C_{68}Cl_{18}$                 | -33.8997               |
| $C_{68}Cl_{19}$     | -63.3696               | $C_{68}Cl_{19}$                 | -63.3696               | $C_{68}Cl_{19}$                 | -63.3696               |
| $C_{68}Cl_{20}$     | -64.1627               | $C_{68}Cl_{20}$                 | -64.1627               | $C_{68}Cl_{20}$                 | -64.1627               |
| $C_{68}Cl_{21}$     | -22.7062               | $C_{68}Cl_{21}$                 | -22.7062               | $C_{68}Cl_{21}$                 | -22.7062               |
| $C_{68}Cl_{22}$     | -57.4764               | $C_{68}Cl_{22}$                 | -57.4764               | $C_{68}Cl_{22}$                 | -57.4764               |
| $C_{68}Cl_{23}$     | -64.3502               | $C_{68}Cl_{23}$                 | -64.3502               | $C_{68}Cl_{23}$                 | -64.3502               |
| $C_{68}Cl_{24}$     | -46.2432               | $C_{68}Cl_{24}$                 | -46.2432               | $C_{68}Cl_{24}$                 | -46.2432               |
| $C_{68}Cl_{25}$     | -69.7772               | $C_{68}Cl_{25}$                 | -69.7772               | $C_{68}Cl_{25}$                 | -69.7772               |
| $C_{68}Cl_{26}$     | -41.4487               | $C_{68}Cl_{26}$                 | -20.2058               | $C_{68}Cl_{25}(OH)_1$           | -63.0314               |
| $C_{68}Cl_{27}$     | -31.2763               | $C_{68}Cl_{26}(OH)_1$           | -67.5141               | $C_{68}Cl_{25}(OH)_2$           | -49.6422               |
| $C_{68}Cl_{28}$     | -44.7067               | $C_{68}Cl_{26}(OH)_2$           | -72.1625               | $C_{68}Cl_{25}(OH)_3$           | -72.9658               |
| Total BE            | -1396.14               | Total BE                        | -1439.59               | Total BE                        | -1464.34               |

## 8. Optimized coordinates of $C_{2v}^{-\#6073} C_{68}$ in gas phase:

Table S6. Coordinates of optimized structure of  $C_{2v}^{-\#6073} C_{68}$  in gas phase at the B3LYP-D3BJ/6-31G\* level.

| Atoms | Coordinates |          |           |
|-------|-------------|----------|-----------|
|       | X           | Y        | Z         |
| C     | 0.728067    | 4.15495  | -1.016761 |
| C     | -0.728067   | 4.15495  | -1.016761 |
| C     | 1.181986    | 4.061635 | 0.33108   |
| C     | -1.181986   | 4.061635 | 0.33108   |
| C     | 0           | 4.048205 | 1.200222  |
| C     | 1.176853    | 3.260036 | -2.006213 |
| C     | -1.176853   | 3.260036 | -2.006213 |
| C     | 0           | 3.251284 | 2.337416  |
| C     | 2.280271    | 3.243785 | 0.632047  |
| C     | -2.280271   | 3.243785 | 0.632047  |
| C     | 0           | 2.74994  | -2.705435 |
| C     | 1.167352    | 2.451714 | 2.674141  |
| C     | -1.167352   | 2.451714 | 2.674141  |
| C     | 2.282285    | 2.455027 | 1.847223  |
| C     | -2.282285   | 2.455027 | 1.847223  |
| C     | 2.867127    | 2.426839 | -0.402658 |
| C     | -2.867127   | 2.426839 | -0.402658 |
| C     | 2.296486    | 2.390026 | -1.726246 |
| C     | -2.296486   | 2.390026 | -1.726246 |
| C     | 0           | 1.460865 | -3.263591 |
| C     | 0.71654     | 1.204474 | 3.269035  |
| C     | -0.71654    | 1.204474 | 3.269035  |
| C     | 2.975204    | 1.207797 | 1.582985  |
| C     | -2.975204   | 1.207797 | 1.582985  |
| C     | 3.375944    | 1.215002 | 0.201814  |
| C     | -3.375944   | 1.215002 | 0.201814  |
| C     | 2.349503    | 1.156371 | -2.411625 |
| C     | -2.349503   | 1.156371 | -2.411625 |
| C     | 1.222603    | 0.701492 | -3.241442 |
| C     | -1.222603   | 0.701492 | -3.241442 |
| C     | 1.456206    | 0        | 3.125201  |
| C     | 2.633266    | 0        | 2.249499  |
| C     | -1.456206   | 0        | 3.125201  |
| C     | 3.47236     | 0        | -0.529429 |
| C     | -2.633266   | 0        | 2.249499  |
| C     | 3.00266     | 0        | -1.880644 |
| C     | -3.47236    | 0        | -0.529429 |
| C     | -3.00266    | 0        | -1.880644 |

---

|   |           |           |           |
|---|-----------|-----------|-----------|
| C | 1.222603  | -0.701492 | -3.241442 |
| C | -1.222603 | -0.701492 | -3.241442 |
| C | 2.349503  | -1.156371 | -2.411625 |
| C | -2.349503 | -1.156371 | -2.411625 |
| C | 3.375944  | -1.215002 | 0.201814  |
| C | -3.375944 | -1.215002 | 0.201814  |
| C | 2.975204  | -1.207797 | 1.582985  |
| C | -2.975204 | -1.207797 | 1.582985  |
| C | 0.71654   | -1.204474 | 3.269035  |
| C | -0.71654  | -1.204474 | 3.269035  |
| C | 0         | -1.460865 | -3.263591 |
| C | 2.296486  | -2.390026 | -1.726246 |
| C | -2.296486 | -2.390026 | -1.726246 |
| C | 2.867127  | -2.426839 | -0.402658 |
| C | -2.867127 | -2.426839 | -0.402658 |
| C | 2.282285  | -2.455027 | 1.847223  |
| C | -2.282285 | -2.455027 | 1.847223  |
| C | 1.167352  | -2.451714 | 2.674141  |
| C | -1.167352 | -2.451714 | 2.674141  |
| C | 0         | -2.74994  | -2.705435 |
| C | 2.280271  | -3.243785 | 0.632047  |
| C | -2.280271 | -3.243785 | 0.632047  |
| C | 0         | -3.251284 | 2.337416  |
| C | 1.176853  | -3.260036 | -2.006213 |
| C | -1.176853 | -3.260036 | -2.006213 |
| C | 0         | -4.048205 | 1.200222  |
| C | 1.181986  | -4.061635 | 0.33108   |
| C | -1.181986 | -4.061635 | 0.33108   |
| C | 0.728067  | -4.15495  | -1.016761 |
| C | -0.728067 | -4.15495  | -1.016761 |

---

## 9. Optimized coordinates of C<sub>1</sub>-C<sub>68</sub>(NC3) in gas phase:

Table S7. Coordinates of optimized structure of C<sub>1</sub>-C<sub>68</sub>(NC3) in gas phase at the B3LYP-D3BJ/6-31G\* level.

| Atoms | Coordinates |          |          |
|-------|-------------|----------|----------|
|       | X           | Y        | Z        |
| C     | -1.29548    | -3.43751 | -0.12187 |
| C     | -2.01272    | -2.89555 | -1.20775 |
| C     | -1.48221    | -2.12244 | -2.34769 |
| C     | -0.17103    | -1.97144 | -2.71858 |
| C     | 0.970262    | -2.71111 | -2.2561  |
| C     | 1.16641     | -3.32612 | -0.9419  |
| C     | 0.170366    | -3.65568 | -0.02017 |
| C     | 0.530104    | -3.5453  | 1.357337 |
| C     | -0.67953    | -3.24108 | 2.096248 |
| C     | -1.79967    | -3.15635 | 1.220348 |
| C     | -2.80537    | -2.17183 | 1.478232 |
| C     | -3.65684    | -1.86037 | 0.382129 |
| C     | -3.27177    | -2.29683 | -0.90789 |
| C     | -3.5564     | -1.2231  | -1.85111 |
| C     | -2.3964     | -1.00901 | -2.60909 |
| C     | -1.89823    | 0.332748 | -2.82266 |
| C     | -0.4364     | 0.529675 | -2.97341 |
| C     | 0.326713    | -0.63652 | -3.14892 |
| C     | 1.73641     | -0.6391  | -2.98898 |
| C     | 2.124664    | -1.97342 | -2.56824 |
| C     | 3.072309    | -2.13395 | -1.52676 |
| C     | 2.463073    | -2.87159 | -0.44774 |
| C     | 2.63782     | -2.3918  | 0.913154 |
| C     | 1.592445    | -2.73161 | 1.815517 |
| C     | 1.01052     | -1.88105 | 2.888294 |
| C     | -0.39393    | -2.28051 | 3.03861  |
| C     | -1.22875    | -1.13391 | 3.131389 |
| C     | -2.48058    | -1.09387 | 2.446051 |
| C     | -2.99997    | 0.194912 | 2.208367 |
| C     | -4.0245     | 0.421852 | 1.194474 |
| C     | -4.29266    | -0.5535  | 0.234596 |
| C     | -4.23534    | -0.17333 | -1.18589 |
| C     | -3.90576    | 1.142665 | -1.55819 |
| C     | -2.70296    | 1.378833 | -2.35277 |
| C     | -2.03329    | 2.573171 | -1.81888 |
| C     | -0.59394    | 2.711627 | -1.83332 |
| C     | 0.242566    | 1.724125 | -2.4982  |
| C     | 1.686029    | 1.700978 | -2.22798 |



---

|   |          |          |          |
|---|----------|----------|----------|
| C | 2.453362 | 0.503896 | -2.54734 |
| C | 3.720565 | 0.242022 | -1.88435 |
| C | 3.952834 | -1.10029 | -1.27447 |
| C | 4.416935 | -0.89508 | 0.055458 |
| C | 3.535909 | -1.27749 | 1.137624 |
| C | 3.293244 | -0.03167 | 1.923718 |
| C | 2.087325 | 0.410497 | 2.578901 |
| C | 1.046802 | -0.49315 | 3.004319 |
| C | -0.36306 | -0.00381 | 3.169617 |
| C | -0.78953 | 1.284288 | 2.757421 |
| C | -2.18242 | 1.403002 | 2.347124 |
| C | -2.76799 | 2.393762 | 1.476515 |
| C | -3.93177 | 1.785493 | 0.798503 |
| C | -3.91947 | 2.149236 | -0.54481 |
| C | -2.78764 | 3.048024 | -0.74176 |
| C | -2.13704 | 3.257189 | 0.535623 |
| C | -0.77428 | 3.535296 | 0.493676 |
| C | -0.04957 | 3.462871 | -0.77356 |
| C | 1.350112 | 3.417014 | -0.47091 |
| C | 2.255787 | 2.622976 | -1.23861 |
| C | 3.481318 | 2.285333 | -0.57119 |
| C | 4.281062 | 1.172649 | -0.99947 |
| C | 4.807381 | 0.469555 | 0.17246  |
| C | 4.106331 | 0.99331  | 1.262703 |
| C | 3.509147 | 2.249071 | 0.888546 |
| C | 2.403274 | 2.674127 | 1.593843 |
| C | 1.67698  | 1.787342 | 2.479095 |
| C | 0.277268 | 2.207319 | 2.435173 |
| C | 0.187214 | 3.332959 | 1.524097 |
| C | 1.483938 | 3.521544 | 0.941372 |

---

## 10. Optimized coordinates of $C_1-C_{68}Cl_{28}$ in gas phase:

Table S8. Coordinates of optimized structure of  $C_1-C_{68}Cl_{28}$  in gas phase at the B3LYP-D3BJ/6-31G\* level.

| Atoms | Coordinates |          |          |
|-------|-------------|----------|----------|
|       | X           | Y        | Z        |
| C     | 0.015273    | -1.60557 | -2.72228 |
| C     | 1.461573    | -1.71928 | -3.05811 |
| C     | 2.197625    | -0.49386 | -2.58595 |
| C     | 1.537961    | 0.779448 | -2.55933 |
| C     | 0.108129    | 0.856649 | -2.74152 |
| C     | -0.65239    | -0.3664  | -2.78749 |
| C     | -0.50853    | -2.68434 | -2.03629 |
| C     | 0.605475    | -3.62854 | -1.64574 |
| C     | 1.931717    | -3.11536 | -2.42352 |
| C     | 2.992695    | -2.92975 | -1.25468 |
| C     | 4.075471    | -1.84276 | -1.47428 |
| C     | 3.469228    | -0.60257 | -2.07041 |
| C     | 4.131624    | 0.525498 | -1.58046 |
| C     | 3.50522     | 1.732466 | -1.45066 |
| C     | 2.213519    | 1.907498 | -1.98119 |
| C     | 1.472004    | 3.047045 | -1.57671 |
| C     | 0.127312    | 3.119817 | -1.79033 |
| C     | -0.57935    | 2.049433 | -2.41169 |
| C     | -1.99808    | 2.025606 | -2.30238 |
| C     | -2.70335    | 0.862611 | -2.30787 |
| C     | -2.03419    | -0.37312 | -2.471   |
| C     | -2.60242    | -1.52949 | -1.90212 |
| C     | -1.80563    | -2.58019 | -1.47019 |
| C     | -2.49142    | -3.34787 | -0.33893 |
| C     | -1.55337    | -3.55558 | 0.998583 |
| C     | -0.08955    | -3.16176 | 0.811459 |
| C     | 0.856816    | -3.24858 | -0.21509 |
| C     | 2.110191    | -2.64744 | -0.07155 |
| C     | 2.442021    | -1.80234 | 1.002365 |
| C     | 3.525868    | -0.86033 | 0.838801 |
| C     | 4.659853    | -1.20554 | -0.10959 |
| C     | 5.136909    | 0.233927 | -0.51073 |
| C     | 4.624458    | 1.252337 | 0.580894 |
| C     | 4.06036     | 2.488988 | -0.26652 |
| C     | 2.929248    | 3.27329  | 0.454619 |
| C     | 1.939076    | 4.009814 | -0.49897 |
| C     | 0.558946    | 4.136993 | 0.311544 |

---

|    |          |          |          |
|----|----------|----------|----------|
| C  | -0.53292 | 4.096765 | -0.83944 |
| C  | -1.93358 | 3.627521 | -0.54739 |
| C  | -2.78294 | 3.184051 | -1.7588  |
| C  | -4.11426 | 2.490975 | -1.19584 |
| C  | -4.13138 | 1.014113 | -1.88235 |
| C  | -4.5766  | -0.18311 | -0.96219 |
| C  | -4.02075 | -1.60412 | -1.39591 |
| C  | -3.7397  | -2.41386 | -0.05565 |
| C  | -3.36129 | -1.2601  | 0.832691 |
| C  | -2.43888 | -1.26872 | 1.882013 |
| C  | -1.92518 | -2.60848 | 2.338079 |
| C  | -0.54759 | -2.45202 | 3.087418 |
| C  | 0.368758 | -2.52048 | 1.942923 |
| C  | 1.518987 | -1.77429 | 2.047254 |
| C  | 1.413874 | -0.81783 | 3.191434 |
| C  | 1.329364 | 0.551905 | 2.573896 |
| C  | 2.313334 | 1.138529 | 1.751168 |
| C  | 3.484814 | 0.454285 | 1.201447 |
| C  | 1.970647 | 2.379758 | 1.196758 |
| C  | 0.658267 | 2.888531 | 1.193583 |
| C  | -0.34223 | 2.23065  | 1.91494  |
| C  | -1.83049 | 2.538637 | 1.86239  |
| C  | -2.43878 | 3.100688 | 0.570585 |
| C  | -3.80619 | 2.463346 | 0.350463 |
| C  | -3.52196 | 1.122328 | 0.91368  |
| C  | -3.89506 | -0.07264 | 0.356892 |
| C  | -2.53356 | 1.161959 | 1.881575 |
| C  | -2.02095 | -0.03442 | 2.411013 |
| C  | -0.904   | 0.175534 | 3.399149 |
| C  | -0.06625 | -1.10599 | 3.820792 |
| C  | 0.059971 | 1.105226 | 2.673863 |
| Cl | 1.604466 | -1.64605 | -4.90869 |
| Cl | 0.228701 | -5.36856 | -1.85493 |
| Cl | 2.495665 | -4.2493  | -3.66126 |
| Cl | 3.779825 | -4.52732 | -0.851   |
| Cl | 5.406125 | -2.42591 | -2.54578 |
| Cl | -3.07189 | -4.9087  | -1.04749 |
| Cl | -1.58133 | -5.28721 | 1.505437 |
| Cl | 5.872682 | -2.22236 | 0.715545 |
| Cl | 6.841327 | 0.387582 | -0.98184 |
| Cl | 5.813063 | 1.689    | 1.84041  |
| Cl | 5.402504 | 3.571671 | -0.80143 |
| Cl | 3.629446 | 4.405371 | 1.689485 |
| Cl | 2.599413 | 5.526466 | -1.17039 |

---

---

|    |          |          |          |
|----|----------|----------|----------|
| Cl | 0.399645 | 5.57301  | 1.369258 |
| Cl | -0.66423 | 5.779973 | -1.56395 |
| Cl | -3.08993 | 4.37511  | -3.07708 |
| Cl | -5.58789 | 3.399259 | -1.56529 |
| Cl | -5.10673 | 0.991637 | -3.4145  |
| Cl | -6.36465 | -0.16414 | -0.72219 |
| Cl | -5.04395 | -2.44661 | -2.5957  |
| Cl | -5.17082 | -3.27344 | 0.588753 |
| Cl | -3.19756 | -3.31882 | 3.390463 |
| Cl | -0.19719 | -3.89624 | 4.129811 |
| Cl | 2.811475 | -0.95729 | 4.326196 |
| Cl | -2.24178 | 3.723381 | 3.214647 |
| Cl | -5.09069 | 3.228761 | 1.396985 |
| Cl | -1.66033 | 1.004127 | 4.845908 |
| Cl | 0.011537 | -1.29614 | 5.581843 |

---

## 11. Optimized coordinates of $C_1-C_{68}Cl_{26}(OH)_2$ in gas phase:

Table S9. Coordinates of optimized structure of  $C_1-C_{68}Cl_{26}(OH)_2$  in gas phase at the B3LYP-D3BJ/6-31G\* level.

| Atoms | Coordinates |          |          |
|-------|-------------|----------|----------|
|       | X           | Y        | Z        |
| Cl    | -1.78107    | -5.26212 | 1.260959 |
| Cl    | -3.31295    | -4.69289 | -1.23265 |
| Cl    | -0.0471     | -5.25034 | -2.13948 |
| Cl    | -0.28537    | -4.05655 | 3.927183 |
| Cl    | -3.27434    | -3.32932 | 3.278292 |
| Cl    | -5.30659    | -3.05542 | 0.528238 |
| Cl    | -5.21281    | -2.07084 | -2.61163 |
| Cl    | 2.210243    | -4.10729 | -3.96446 |
| Cl    | 3.547014    | -4.61719 | -1.19153 |
| Cl    | 2.844322    | -1.27665 | 4.20184  |
| Cl    | 0.043708    | -1.53349 | 5.493416 |
| Cl    | -1.49587    | 0.900884 | 4.905918 |
| Cl    | -6.38887    | 0.167817 | -0.59321 |
| Cl    | -5.14082    | 1.411849 | -3.25172 |
| Cl    | 5.231907    | -2.50092 | -2.80798 |
| Cl    | 5.779533    | -2.48613 | 0.444249 |
| Cl    | -4.89977    | 3.396382 | 1.680316 |
| Cl    | -5.47184    | 3.737636 | -1.26589 |
| Cl    | -2.96542    | 4.676394 | -2.79417 |
| Cl    | -0.4445     | 5.895909 | -1.27254 |
| Cl    | 6.825556    | 0.163078 | -1.14363 |
| Cl    | 5.920593    | 1.364128 | 1.763293 |
| Cl    | 5.533969    | 3.39496  | -0.76894 |
| Cl    | 3.853486    | 4.176123 | 1.803211 |
| Cl    | 0.658747    | 5.485692 | 1.630451 |
| Cl    | 2.810473    | 5.486359 | -0.96874 |
| O     | 1.464576    | -1.6181  | -4.62566 |
| H     | 1.189694    | -0.74445 | -4.95145 |
| O     | -1.98185    | 3.424122 | 3.114532 |
| H     | -1.83299    | 2.936494 | 3.943614 |
| C     | -1.69294    | -3.50913 | 0.840212 |
| C     | -2.65184    | -3.19473 | -0.46285 |
| C     | -1.95822    | -2.40131 | -1.5714  |
| C     | -0.67975    | -2.5317  | -2.17164 |
| C     | 0.404227    | -3.5383  | -1.85356 |
| C     | 0.701631    | -3.24284 | -0.41226 |
| C     | -0.21772    | -3.16695 | 0.639223 |

---

|   |          |          |          |
|---|----------|----------|----------|
| C | 0.292569 | -2.60523 | 1.790549 |
| C | -0.59715 | -2.55437 | 2.957033 |
| C | -1.99585 | -2.61878 | 2.232165 |
| C | -2.46154 | -1.23888 | 1.855162 |
| C | -3.40498 | -1.13544 | 0.830459 |
| C | -3.85288 | -2.22454 | -0.10467 |
| C | -4.12657 | -1.3355  | -1.396   |
| C | -2.71788 | -1.29621 | -1.93145 |
| C | -2.1125  | -0.1379  | -2.45435 |
| C | -0.73764 | -0.17695 | -2.80404 |
| C | -0.1231  | -1.44414 | -2.81555 |
| C | 1.31482  | -1.60594 | -3.20852 |
| C | 1.730154 | -3.03847 | -2.63403 |
| C | 2.824838 | -2.96626 | -1.48825 |
| C | 1.98492  | -2.70769 | -0.26799 |
| C | 2.377855 | -1.93367 | 0.839146 |
| C | 1.478849 | -1.91908 | 1.906225 |
| C | 1.440054 | -1.01658 | 3.097952 |
| C | -0.04395 | -1.26534 | 3.742258 |
| C | -0.82257 | 0.065849 | 3.384875 |
| C | -1.97737 | -0.05017 | 2.430019 |
| C | -2.44199 | 1.190699 | 1.971657 |
| C | -3.45264 | 1.245836 | 1.031546 |
| C | -3.89364 | 0.098026 | 0.426756 |
| C | -4.60915 | 0.084433 | -0.87835 |
| C | -4.1313  | 1.309424 | -1.74433 |
| C | -2.72133 | 1.116712 | -2.21264 |
| C | -1.96399 | 2.245325 | -2.16348 |
| C | -0.54736 | 2.212576 | -2.30414 |
| C | 0.078863 | 1.009808 | -2.708   |
| C | 1.510407 | 0.862876 | -2.56767 |
| C | 2.109673 | -0.4356  | -2.66755 |
| C | 3.38864  | -0.62197 | -2.19657 |
| C | 3.951013 | -1.91728 | -1.67777 |
| C | 4.594232 | -1.37684 | -0.29872 |
| C | 3.499422 | -1.03218 | 0.694955 |
| C | 3.52671  | 0.263258 | 1.122671 |
| C | 2.39993  | 0.968664 | 1.733366 |
| C | 1.408389 | 0.382966 | 2.546708 |
| C | 0.165832 | 0.984571 | 2.691401 |
| C | -0.20641 | 2.161791 | 2.003192 |
| C | -1.68929 | 2.558035 | 2.041308 |
| C | -2.29329 | 3.199065 | 0.773662 |
| C | -3.68872 | 2.62886  | 0.551923 |

---

---

|   |          |          |          |
|---|----------|----------|----------|
| C | -4.03199 | 2.747544 | -0.98241 |
| C | -2.68302 | 3.407315 | -1.54308 |
| C | -1.78957 | 3.751466 | -0.33149 |
| C | -0.37589 | 4.173849 | -0.63416 |
| C | 0.220101 | 3.219238 | -1.64812 |
| C | 1.565495 | 3.080363 | -1.47309 |
| C | 2.24835  | 1.93288  | -1.95234 |
| C | 3.542303 | 1.674848 | -1.46342 |
| C | 4.111898 | 0.449521 | -1.6683  |
| C | 5.126517 | 0.05989  | -0.63922 |
| C | 4.685046 | 1.042669 | 0.513633 |
| C | 4.156934 | 2.34489  | -0.25677 |
| C | 3.077778 | 3.139319 | 0.529906 |
| C | 2.098696 | 2.249738 | 1.249048 |
| C | 0.809275 | 2.811955 | 1.300677 |
| C | 0.742478 | 4.108028 | 0.489201 |
| C | 2.098324 | 3.966413 | -0.35981 |

---

## 12. Optimized coordinates of $C_1-C_{68}Cl_{25}(OH)_3$ in gas phase:

Table S10. Coordinates of optimized structure of  $C_1-C_{68}Cl_{25}(OH)_3$  in gas phase at the B3LYP-D3BJ/6-31G\* level.

| Atoms | Coordinates |          |          |
|-------|-------------|----------|----------|
|       | X           | Y        | Z        |
| Cl    | -1.83648    | -5.2455  | 1.281709 |
| Cl    | -3.39168    | -4.63903 | -1.19453 |
| Cl    | -0.14566    | -5.21815 | -2.13685 |
| Cl    | -0.31246    | -4.04961 | 3.980658 |
| Cl    | -3.30059    | -3.31697 | 3.318234 |
| Cl    | -5.36207    | -2.99591 | 0.586436 |
| Cl    | -5.27636    | -1.97352 | -2.54385 |
| Cl    | 2.101912    | -4.08314 | -3.97711 |
| Cl    | 3.462703    | -4.63854 | -1.22445 |
| Cl    | 2.831983    | -1.34485 | 4.236509 |
| Cl    | -0.00482    | -1.47703 | 5.529728 |
| Cl    | -6.41673    | 0.255679 | -0.49326 |
| Cl    | -5.16621    | 1.529199 | -3.13651 |
| Cl    | 5.153776    | -2.52849 | -2.84311 |
| Cl    | 5.744632    | -2.55334 | 0.400126 |
| Cl    | -4.86552    | 3.43055  | 1.824811 |
| Cl    | -5.44984    | 3.833845 | -1.11564 |
| Cl    | -2.94294    | 4.748994 | -2.65582 |
| Cl    | -0.39999    | 5.923706 | -1.14912 |
| Cl    | 6.802815    | 0.096779 | -1.17652 |
| Cl    | 5.953388    | 1.282916 | 1.75339  |
| Cl    | 5.559764    | 3.34246  | -0.75496 |
| Cl    | 3.923983    | 4.12452  | 1.845504 |
| Cl    | 0.740233    | 5.470769 | 1.733057 |
| Cl    | 2.858427    | 5.47319  | -0.90069 |
| O     | 1.379035    | -1.57889 | -4.6048  |
| H     | 1.107488    | -0.69985 | -4.91868 |
| O     | -1.91949    | 3.282289 | 3.305705 |
| H     | -1.85624    | 2.6431   | 4.042351 |
| O     | -1.37174    | 0.742684 | 4.557647 |
| H     | -0.70536    | 0.746586 | 5.267981 |
| C     | -1.74013    | -3.48941 | 0.872802 |
| C     | -2.7119     | -3.1523  | -0.42026 |
| C     | -2.02022    | -2.35375 | -1.5263  |
| C     | -0.7483     | -2.49182 | -2.13773 |
| C     | 0.327376    | -3.51366 | -1.84013 |
| C     | 0.644708    | -3.23642 | -0.3992  |



---

|   |          |          |          |
|---|----------|----------|----------|
| C | -0.26236 | -3.16255 | 0.66301  |
| C | 0.266951 | -2.62257 | 1.816735 |
| C | -0.61629 | -2.55876 | 2.990081 |
| C | -2.02189 | -2.61085 | 2.269574 |
| C | -2.47441 | -1.22608 | 1.899762 |
| C | -3.43495 | -1.09982 | 0.894805 |
| C | -3.90343 | -2.17322 | -0.04568 |
| C | -4.17556 | -1.26501 | -1.32521 |
| C | -2.76982 | -1.23541 | -1.8681  |
| C | -2.15485 | -0.07725 | -2.38027 |
| C | -0.78382 | -0.12929 | -2.74297 |
| C | -0.1852  | -1.40375 | -2.7751  |
| C | 1.245791 | -1.57906 | -3.18577 |
| C | 1.650002 | -3.02226 | -2.63034 |
| C | 2.758298 | -2.97551 | -1.49665 |
| C | 1.936357 | -2.71909 | -0.26325 |
| C | 2.352476 | -1.96293 | 0.848453 |
| C | 1.464387 | -1.95282 | 1.926409 |
| C | 1.439575 | -1.0547  | 3.121607 |
| C | -0.05117 | -1.27237 | 3.756466 |
| C | -0.81133 | 0.073931 | 3.425203 |
| C | -1.95788 | -0.05118 | 2.463399 |
| C | -2.41052 | 1.193682 | 2.024963 |
| C | -3.44314 | 1.281421 | 1.115094 |
| C | -3.91313 | 0.145317 | 0.510508 |
| C | -4.63973 | 0.155823 | -0.78735 |
| C | -4.14951 | 1.389142 | -1.63718 |
| C | -2.74527 | 1.182349 | -2.1164  |
| C | -1.97172 | 2.299421 | -2.05682 |
| C | -0.55793 | 2.250896 | -2.21536 |
| C | 0.048453 | 1.045956 | -2.64208 |
| C | 1.479579 | 0.880463 | -2.52225 |
| C | 2.061139 | -0.42439 | -2.64289 |
| C | 3.342997 | -0.6321  | -2.18962 |
| C | 3.89516  | -1.93951 | -1.69047 |
| C | 4.562557 | -1.42181 | -0.31486 |
| C | 3.485411 | -1.07379 | 0.69768  |
| C | 3.537725 | 0.218279 | 1.134593 |
| C | 2.428694 | 0.932494 | 1.762385 |
| C | 1.433402 | 0.34729  | 2.570985 |
| C | 0.200392 | 0.958274 | 2.716041 |
| C | -0.16503 | 2.149163 | 2.056821 |
| C | -1.64821 | 2.538902 | 2.136531 |
| C | -2.26533 | 3.23754  | 0.901568 |

---

---

|   |          |          |          |
|---|----------|----------|----------|
| C | -3.66861 | 2.677487 | 0.672596 |
| C | -4.0225  | 2.819394 | -0.8561  |
| C | -2.66834 | 3.464533 | -1.41734 |
| C | -1.76013 | 3.785642 | -0.208   |
| C | -0.34309 | 4.194239 | -0.52856 |
| C | 0.228972 | 3.242575 | -1.56054 |
| C | 1.57575  | 3.087229 | -1.40799 |
| C | 2.23839  | 1.935621 | -1.9068  |
| C | 3.535485 | 1.655858 | -1.43753 |
| C | 4.086316 | 0.424928 | -1.66084 |
| C | 5.109367 | 0.011641 | -0.64951 |
| C | 4.697062 | 0.988887 | 0.517285 |
| C | 4.175357 | 2.306393 | -0.23354 |
| C | 3.117122 | 3.108133 | 0.574259 |
| C | 2.136295 | 2.22261  | 1.295138 |
| C | 0.853742 | 2.800866 | 1.363973 |
| C | 0.793469 | 4.10622  | 0.573337 |
| C | 2.135796 | 3.95685  | -0.29509 |

---

### 13. Optimized coordinates of $\text{Sc}_2\text{C}_2@C_2\text{-}^{6073}\text{C}_{68}$ in gas phase:

Table S11. Coordinates of optimized structure of  $\text{Sc}_2\text{C}_2@C_2\text{-}^{6073}\text{C}_{68}$  in gas phase at the B3LYP-D3BJ/6-31G\* level.

| Atoms | Coordinates |          |          |
|-------|-------------|----------|----------|
|       | X           | Y        | Z        |
| C     | -0.67934    | 4.253771 | -1.00528 |
| C     | 0.761111    | 4.197599 | -0.9917  |
| C     | -1.13398    | 4.151142 | 0.381072 |
| C     | 1.21846     | 4.077089 | 0.379556 |
| C     | 0.044556    | 4.071137 | 1.238752 |
| C     | -1.14716    | 3.314948 | -2.00878 |
| C     | 1.208662    | 3.247924 | -1.97483 |
| C     | 0.041119    | 3.251313 | 2.414368 |
| C     | -2.19906    | 3.250905 | 0.650514 |
| C     | 2.286178    | 3.188441 | 0.651135 |
| C     | 0.02773     | 2.744109 | -2.65352 |
| C     | -1.12398    | 2.465636 | 2.731122 |
| C     | 1.190652    | 2.442368 | 2.729703 |
| C     | -2.23543    | 2.459747 | 1.876503 |
| C     | 2.306054    | 2.410091 | 1.880162 |
| C     | -2.81432    | 2.456021 | -0.39144 |
| C     | 2.912322    | 2.401553 | -0.39027 |
| C     | -2.26228    | 2.426467 | -1.72802 |
| C     | 2.331056    | 2.366007 | -1.71142 |
| C     | 0.016193    | 1.440753 | -3.27597 |
| C     | -0.7006     | 1.207518 | 3.328891 |
| C     | 0.732387    | 1.193895 | 3.327011 |
| C     | -2.96631    | 1.246298 | 1.618087 |
| C     | 3.010764    | 1.181637 | 1.623762 |
| C     | -3.32824    | 1.249677 | 0.222854 |
| C     | 3.387099    | 1.184587 | 0.225028 |
| C     | -2.31725    | 1.189014 | -2.43052 |
| C     | 2.352841    | 1.137054 | -2.42897 |
| C     | -1.21846    | 0.727512 | -3.25842 |
| C     | 1.237526    | 0.706078 | -3.25522 |
| C     | -1.45849    | 0.015508 | 3.164355 |
| C     | -2.63894    | 0.026501 | 2.277104 |
| C     | 1.458493    | -0.01551 | 3.164355 |
| C     | -3.43659    | 0.034525 | -0.51386 |
| C     | 2.638935    | -0.0265  | 2.277104 |
| C     | -2.96029    | 0.032713 | -1.86932 |
| C     | 3.436586    | -0.03453 | -0.51386 |

---

|    |          |          |          |
|----|----------|----------|----------|
| C  | 2.960294 | -0.03271 | -1.86932 |
| C  | -1.23753 | -0.70608 | -3.25522 |
| C  | 1.21846  | -0.72751 | -3.25842 |
| C  | -2.35284 | -1.13705 | -2.42897 |
| C  | 2.317254 | -1.18901 | -2.43052 |
| C  | -3.3871  | -1.18459 | 0.225028 |
| C  | 3.328244 | -1.24968 | 0.222854 |
| C  | -3.01076 | -1.18164 | 1.623762 |
| C  | 2.966306 | -1.2463  | 1.618087 |
| C  | -0.73239 | -1.1939  | 3.327011 |
| C  | 0.700604 | -1.20752 | 3.328891 |
| C  | -0.01619 | -1.44075 | -3.27597 |
| C  | -2.33106 | -2.36601 | -1.71142 |
| C  | 2.262277 | -2.42647 | -1.72802 |
| C  | -2.91232 | -2.40155 | -0.39027 |
| C  | 2.814319 | -2.45602 | -0.39144 |
| C  | -2.30605 | -2.41009 | 1.880162 |
| C  | 2.235433 | -2.45975 | 1.876503 |
| C  | -1.19065 | -2.44237 | 2.729703 |
| C  | 1.123983 | -2.46564 | 2.731122 |
| C  | -0.02773 | -2.74411 | -2.65352 |
| C  | -2.28618 | -3.18844 | 0.651135 |
| C  | 2.199059 | -3.25091 | 0.650514 |
| C  | -0.04112 | -3.25131 | 2.414368 |
| C  | -1.20866 | -3.24792 | -1.97483 |
| C  | 1.147157 | -3.31495 | -2.00878 |
| C  | -0.04456 | -4.07114 | 1.238752 |
| C  | -1.21846 | -4.07709 | 0.379556 |
| C  | 1.133984 | -4.15114 | 0.381072 |
| C  | -0.76111 | -4.1976  | -0.9917  |
| C  | 0.679339 | -4.25377 | -1.00528 |
| C  | 0.586601 | 0.235598 | 0.175641 |
| C  | -0.5866  | -0.2356  | 0.175641 |
| Sc | 0.115226 | -2.19602 | -0.28802 |
| Sc | -0.11523 | 2.196022 | -0.28802 |

---

#### 14. The details of calculation:

The non-classical isomer  $C_1-C_{68}(NC3)$ , the non-IPR isomer  $C_{2v}^{-\#6073}C_{68}$ , with their derivatives  $C_1-C_{68}Cl_{28}$ ,  $C_1-C_{68}Cl_{26}(OH)_2$ ,  $C_1-C_{68}Cl_{25}(OH)_3$  and  $Sc_2C_2@C_2^{-\#6073}C_{68}$  have been optimized by Gaussian 16 program at the B3LYP-D3BJ/6-31G\* level, with eight-cores CPU (Intel Xeon X5450, 3.0GHz) and 6000MB memory. And then, the single point energies have been calculated by using the 6-311+G (3df, 3pd) basis set. The total CPU times are listed in Table S12.

Table S12. The total CPU times (hour) for the optimization and single point calculations of the non-classical isomer  $C_1-C_{68}(NC3)$ , the non-IPR isomers  $C_{2v}^{-\#6073}C_{68}$ , with their derivatives.

| Molecule                      | CPU time (h) |
|-------------------------------|--------------|
| $C_{2v}^{-\#6073}C_{68}$      | 71.6         |
| $Sc_2C_2@C_2^{-\#6073}C_{68}$ | 240.6        |
| $C_1-C_{68}(NC3)$             | 260.0        |
| $C_1-C_{68}Cl_{28}$           | 569.5        |
| $C_1-C_{68}Cl_{26}(OH)_2$     | 583.2        |
| $C_1-C_{68}Cl_{25}(OH)_3$     | 583.8        |

## References

1. V. A. Brotsman, I. N. Ioffe and S. I. Troyanov, *Chem. Commun.*, 2022, **58**, 6918-6921.
2. Z.-Q. Shi, X. Wu, C.-R. Wang, X. Lu and H. Shinohara, *Angew. Chem. Int. Ed.*, 2006, **45**, 2107-2111.
3. T. Lu and F. Chen, *J. Comput. Chem.*, 2012, 33, 580-592.
